# Supplementary material for: Symmetrical thiol functionalized polyhedral oligomeric silsesquioxanes as building blocks for LB films
Source: Royal Society of Chemistry journal article supplement (doi:10.1039/c1sm05443k), 2011-01-01
Supplement: c1sm05443k.pdf [file c1sm05443k.pdf]

Supplementary Information

**Thiol Functionalized Polyhedral Oligomeric Silsesquioxanes as Building Blocks for LB  
Films in Sensing and Nanoparticle Patterning**

Shlomit Kraus-Ophir, Ivan Jerman, Boris Orel and Daniel Mandler\*

MP<sub>8</sub> POSS can easily be analyzed using <sup>1</sup>H- and <sup>29</sup>Si <sup>29</sup>Si-NMR. As shown in Figure S1, a clean, isolated and well-defined product is obtained.

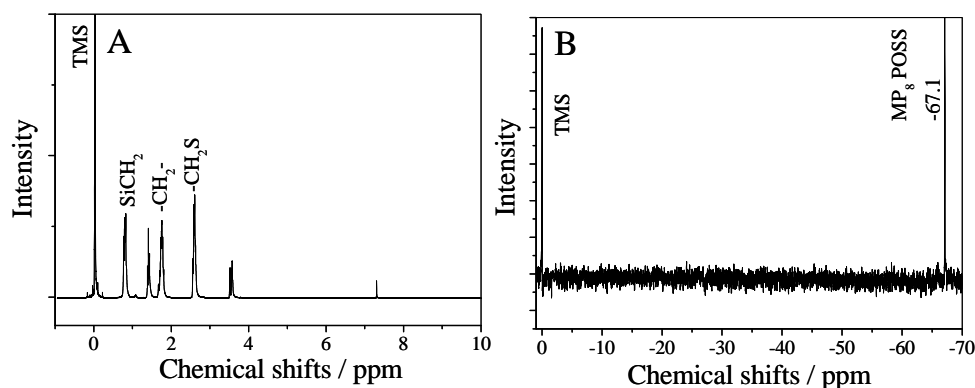

**Figure S1:** <sup>1</sup>H NMR (A) and <sup>29</sup>Si NMR spectra (B) of MP<sub>8</sub>.

However, synthesis of multifunctional POSS from different triethoxysilanes ends with different structure isomers. This has been already noted in the case of mono-substituted heptapropylmercapto-T<sub>8</sub>POSS by Marsmann<sup>1</sup>. Hence, the synthesis of dimercaptohexapropyl-T<sub>8</sub>POSS could lead to a wider spectrum of products. The co-hydrolysis of isooctyltrimethoxysilane (IOTMS) and 3-aminopropyltriethoxysilane (APMTS), which was applied in our previous studies,<sup>2</sup> could lead<sup>3</sup> to even less well-defined products composed of aminopropyl and isooctyl functionalized T<sub>6</sub>, T<sub>8</sub>, T<sub>9</sub>(OH)<sub>3</sub> and other products. We demonstrate here, for the first time, that the co-hydrolysis of IOTMS and 3-mercapto-propyltrimethoxysilane (MPTMS) (not yet tested as a precursor) under basic conditions and by using hydrothermal synthesis led to T<sub>8</sub>POSS compounds that could be well separated.

The identification of isomers can be readily analyzed by <sup>29</sup>Si NMR spectroscopy. Namely, in contrast to a broad signal(s) <sup>29</sup>Si NMR spectra,<sup>4</sup> observed in T<sup>3</sup> region, rather sharp and well separated signals characteristic for each of the isomers are expected.

The product MP<sub>2</sub>IO<sub>6</sub> of the co-hydrolysis of MPTMS and IOTMS performed under basic conditions using hydrothermal synthesis route was analyzed. Preparative medium pressure

liquid chromatography (MPLC) was employed and four fractions were separated. The detection (UV 254 nm) was satisfactory and total amount of ~250 mg of a mixture of compounds were collected for each run. Each of the separated components was analyzed by measuring the corresponding  $^{29}\text{Si}$  NMR spectra (Figure S2).  $^{29}\text{Si}$  NMR spectra revealed unified structure of isomers. A marked difference between the fractions is apparent in the NMR spectra. Expectedly, the  $^{29}\text{Si}$  NMR spectra of the single fraction revealed the various  $\text{T}^3$  signals between -66.16 and -68.25 ppm, corroborating the presence of different isomer species, in contrast to only one sharp  $\text{T}^3$  signal (-66.16 or -68.25 ppm) (not shown) observed in the liquid  $^{29}\text{Si}$  NMR spectra of  $\text{MP}_8$ - or  $\text{IO}_8$ -POSS. The observation of two or more signals in our  $^{29}\text{Si}$  NMR confirms the formation of octameric disubstituted POSS due to different silicon environments as has been reported<sup>1</sup>.  $^{29}\text{Si}$  NMR spectra of  $\text{MP}_2\text{IO}_6$  persuasively confirms the presence of ortho, meta and para substituents in the reaction product and the absence of uncondensed products like  $\text{T}_7(\text{OH})_3$ , and ladder like polymers.

In conclusion, the mixture of products could be separated by chromatography and a singly well-defined product, i.e., the ortho substituted product, was used.

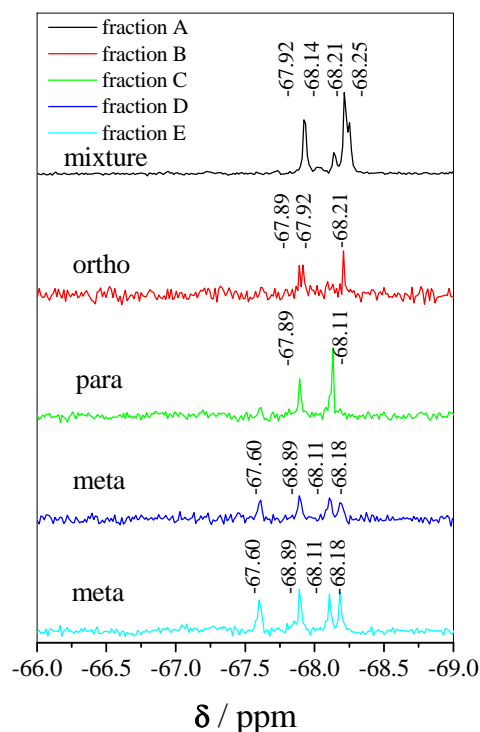

**Figure S2:**  $^{29}\text{Si}$  NMR spectra of  $\text{MP}_2\text{IO}_6$  T8 POSS prepared via the hydrothermal synthesis and separated by NPLC (fraction A - mixture of ortho and para substituents with small amount of  $\text{IO}_8$  T8 POSS, fraction B - ortho product, fraction C – para substituted product, fraction D and E – meta substituted  $\text{MP}_2\text{IO}_6$  T8 POSS product).

- <sup>1</sup> Hendan, B. J.; Marsmann, H. C. *Journal of Organometallic Chemistry* 1994, **483**, 33.
- <sup>2</sup> Jerman, I.; Vuk, A. U.; Kozelj, M.; Orel, B.; Kovac, J. *Langmuir* 2008, **24**, 5029.
- <sup>3</sup> Cordes, D. B.; Lickiss, P. D.; Rataboul, F. *Chemical Reviews* 2010, **110**, 2081.
- <sup>4</sup> Anderson, S. E.; Bodzin, D. J.; Haddad, T. S.; Boatz, J. A.; Mabry, J. M.; Mitchell, C.; Bowers, M. T. *Chemistry of Materials* 2008, **20**, 4299.
